# Supplementary material
Source: publisher figshare collection journal article supplement (https://frontiersin.figshare.com/ndownloader/files/13366130)
Supplement: Supplementary file [file 13366130]

## NUDGING CHARITABLE BEHAVIOR

## Appendix A

Table A.  
*Potential Facebook groups to target*

| Country            | Facebook pages                                                              |                                                                      |
|--------------------|-----------------------------------------------------------------------------|----------------------------------------------------------------------|
|                    | Liberal                                                                     | Conservative                                                         |
| <b>UK</b>          | <i>Young Labour<br/>Young Liberals</i>                                      | <i>UK Young Conservatives<br/>Young Unionists</i>                    |
| <b>Netherlands</b> | <i>Liberale vrienden<br/>De Haagse VVD</i>                                  | <i>Conservatief Café<br/>PerspectieF, ChristenUnie-<br/>jongeren</i> |
| <b>Germany</b>     | <i>“Schwulen Gruppe” -<br/>Ausländer &amp; Deutsche<br/>SCHWULE FAMILIE</i> | <i>Gegenwind Deutschland<br/>Die ÖKO Lüge</i>                        |
| <b>Italy</b>       | <i>Articolo Uno- Movimento<br/>Democratico e Progressista</i>               | <i>Movimento Giovani Padani</i>                                      |

## NUDGING CHARITABLE BEHAVIOR

**A Web Page**

https://

### Nudging Charitable Behavior

Choose your language

Dear participant,

We are an international team of researchers currently working on a project called „Nudging charitable behavior: increasing donations by targeting the morality and social norms of Facebook users“, that is being conducted within the Junior Research Programme (<http://jrp.psycholabs.org/>). You can find out more about the project and the members of our research team here: <http://jrp.psycholabs.org/nudging-charitable-behavior/>.

Next →

**A Web Page**

https://

### Nudging Charitable Behavior

When you decide whether something is right or wrong, to what extent are the following considerations relevant to your thinking? Please rate each statement using this scale.

[0] = not at all relevant (This consideration has nothing to do with my judgments of right and wrong)  
 [1] = not very relevant  
 [2] = slightly relevant  
 [3] = somewhat relevant  
 [4] = very relevant  
 [5] = extremely relevant (This is one of the most important factors when I judge right and wrong)

**Whether or not someone suffered emotionally.**

Not at All Relevant Not Very Relevant Slightly Relevant Somewhat Relevant Very Relevant Extremely Relevant

**Whether or not some people were treated differently than others.**

Not at All Relevant Not Very Relevant Slightly Relevant Somewhat Relevant Very Relevant Extremely Relevant

**Whether or not someone acted unfairly.**

Not at All Relevant Not Very Relevant Slightly Relevant Somewhat Relevant Very Relevant Extremely Relevant

Next →

**A Web Page**

https://

### Nudging Charitable Behavior

Eurochild is a network of organisations and individuals working in and across Europe to promote the rights and well-being of children and young people.

Make a difference and support Eurochild achieving their goal to promote children's well-being. Helping vulnerable children and preventing suffering is the right thing to do. By supporting Eurochild you will get the chance to increase fairness and reduce harm all over the world. Show us that you care for others and make a difference now!

In studies similar to this one, most of the people to decide to donate some of the money should they win it.

Imagine you won a 50€ Amazon gift card. How much money out of 50€ would you be willing to donate to Eurochild charity?

How interested would you be in donating time to volunteer for Eurochild?

Next →

**A Web Page**

https://

### Nudging Charitable Behavior

In the graph below your scores on each foundation are shown in pink, while the typical scores of liberals and conservatives are shown in blue and red.

One of the goals of the study is to see how morality relates to Facebook behavior. Therefore, we would ask you to give us a permission to access the list of your Facebook likes. This app will not collect any additional information such as your personal data, friends list etc. By clicking "Login with Facebook" below, you will give your permission for application to only access your Facebook likes.

Otherwise, you can decide to share your result on your Facebook wall for your friends to see how moral you are. )

Thank you for your participation!

Figure A. The wireframe of a Facebook app

## NUDGING CHARITABLE BEHAVIOR

### Appendix B

#### Instruments to be used in the study

##### 1) Moral foundations questionnaire (Graham, Haidt, & Nosek, 2008)

*Part 1. When you decide whether something is right or wrong, to what extent are the following considerations relevant to your thinking? Please rate each statement using this scale:*

[0] = not at all relevant (This consideration has nothing to do with my judgments of right and wrong)

[1] = not very relevant

[2] = slightly relevant

[3] = somewhat relevant

[4] = very relevant

[5] = extremely relevant (This is one of the most important factors when I judge right and wrong)

1. Whether or not someone suffered emotionally
2. Whether or not some people were treated differently than others
3. Whether or not someone's action showed love for his or her country
4. Whether or not someone showed a lack of respect for authority
5. Whether or not someone violated standards of purity and decency
6. Whether or not someone was good at math
7. Whether or not someone cared for someone weak or vulnerable
8. Whether or not someone acted unfairly
9. Whether or not someone did something to betray his or her group
10. Whether or not someone conformed to the traditions of society
11. Whether or not someone did something disgusting
12. Whether or not someone was cruel
13. Whether or not someone was denied his or her rights
14. Whether or not someone showed a lack of loyalty
15. Whether or not an action caused chaos or disorder
16. Whether or not someone acted in a way that God would approve of

*Part 2. Please read the following sentences and indicate your agreement or disagreement:*

[0] Strongly disagree

[1] Moderately disagree

[2] Slightly disagree

[3] Slightly agree

[4] Moderately agree

[5] Strongly agree

## NUDGING CHARITABLE BEHAVIOR

17. Compassion for those who are suffering is the most crucial virtue.
18. When the government makes laws, the number one principle should be ensuring that everyone is treated fairly.
19. I am proud of my country's history.
20. Respect for authority is something all children need to learn.
21. People should not do things that are disgusting, even if no one is harmed.
22. It is better to do good than to do bad.
23. One of the worst things a person could do is hurt a defenseless animal.
24. Justice is the most important requirement for a society.
25. People should be loyal to their family members, even when they have done something wrong.
26. Men and women each have different roles to play in society.
27. I would call some acts wrong on the grounds that they are unnatural.
28. It can never be right to kill a human being.
29. I think it's morally wrong that rich children inherit a lot of money while poor children inherit nothing.
30. It is more important to be a team player than to express oneself.
31. If I were a soldier and disagreed with my commanding officer's orders, I would obey anyway because that is my duty.
32. Chastity is an important and valuable virtue.

### 2) Moral identity internalization (Aquino & Reed, 2002)

Listed below are some characteristics that may describe a person:

Caring, Compassionate, Fair, Friendly, Generous, Hardworking, Helpful, Honest, Kind

The person with these characteristics could be you or it could be someone else. For a moment, visualize in your mind the kind of person who has these characteristics. Imagine how that person would think, feel, and act. When you have a clear image of what this person would be like, answer the following questions using a 5-point Likert scale (1 strongly disagree, 5 strongly agree).

1. It would make me feel good to be a person who has these characteristics.
2. Being someone who has these characteristics is an important part of who I am.
3. I would be ashamed to be a person who has these characteristics.
4. Having these characteristics is not really important to me.
5. I strongly desire to have these characteristics.

### 3) Attitudes towards charitable behavior

I believe that making a donation to a described charity in terms of money or time would be:

(1) unpleasant – (7) pleasant

## NUDGING CHARITABLE BEHAVIOR

- (1) useful – (7) useless
- (1) satisfying – (7) unsatisfying
- (1) favorable – (7) unfavorable
- (1) positive – (7) negative
- (1) considerate – (7) inconsiderate
- (1) pointless – (7) worthwhile
- (1) bad – (7) good.

### 4) Descriptive social norms

- 1) How likely do you think is that people you know would donate to this charity?  
(1 – very unlikely; 7 – very likely)
- 2) How much do you think an average person doing this survey would donate if they won the gift card?  
(1 – nothing; 7 – all of it)
- 3) How many of the people you know would donate to this charity?  
(1 – none of them; 7 – all of them)
- 4) How many of the people doing this survey would donate to this charity?  
(1 – none of them; 7 – all of them)

### 5) Charitable behavior

The participants will answer the following questions:

“If you were to win the ~~€£~~50 Amazon gift card, how much money out of the 50~~€£~~ would you be willing to donate to this charity?”

~~€£~~0   ~~€£~~5   ~~€£~~10   ~~€£~~15   ~~€£~~20   ~~€£~~25   ~~€£~~30   ~~€£~~35   ~~€£~~40   ~~€£~~45   ~~€£~~50

“How interested are you in donating your time to volunteer for the charity?”

|                       |   |   |   |   |   |                 |
|-----------------------|---|---|---|---|---|-----------------|
| 1                     | 2 | 3 | 4 | 5 | 6 | 7               |
| Not interested at all |   |   |   |   |   | Very interested |

## NUDGING CHARITABLE BEHAVIOR

### Appendix C

#### Pre-study results

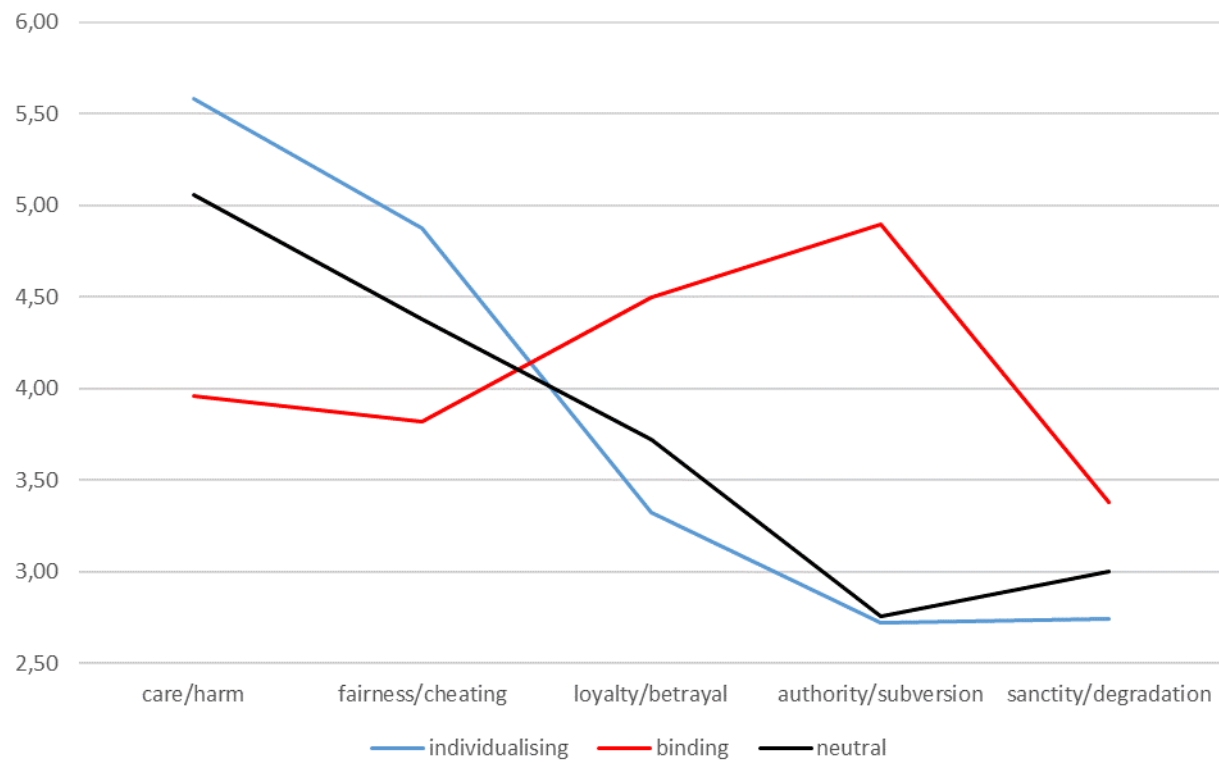

Figure C1. Estimations of the congruence of calls-to-action and moral foundations.

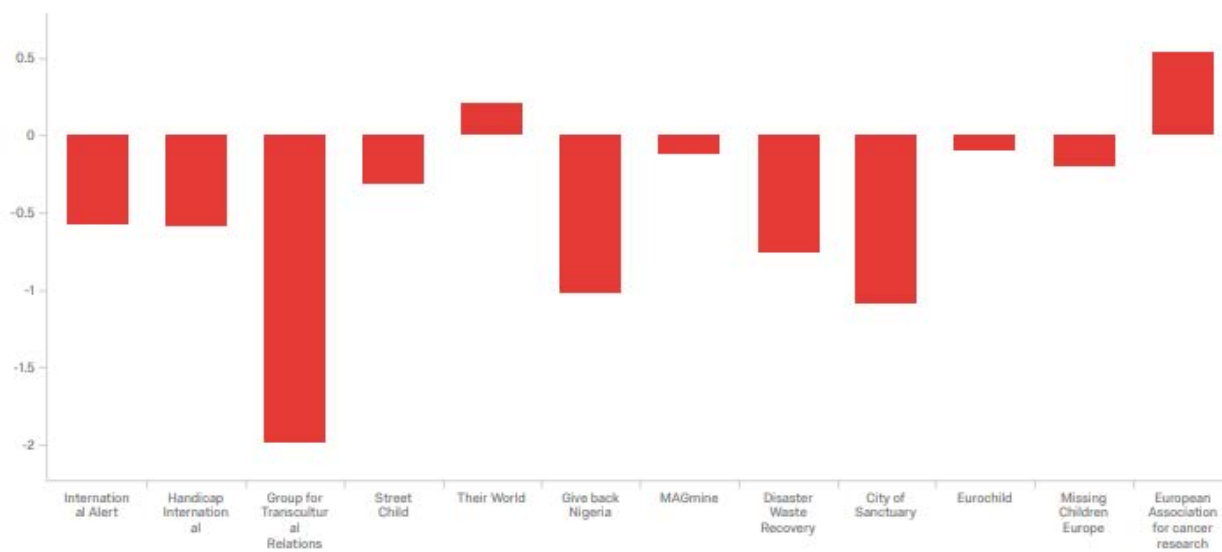

## NUDGING CHARITABLE BEHAVIOR

*Figure C2.* Mean estimations of appropriateness of different charitable organizations for liberals and conservatives (7 point scale where -3 = appropriate for liberals and +3 = appropriate for conservatives).
